# 1 Screening for inborn errors of metabolism using untargeted 2 metabolomics and out-of-batch controls

3  
4 Michiel Bongaerts<sup>1\*</sup>, Ramon Bonte<sup>1</sup>, Serwet Demirdas<sup>1</sup>, Ed H. Jacobs<sup>1</sup>, E. Oussoren<sup>2</sup>, Ans T. van der  
5 Ploeg<sup>2</sup>, Margreet A.E.M. Wagenmakers<sup>3</sup>, Robert M.W. Hofstra<sup>1</sup>, Henk J. Blom<sup>1</sup>, Marcel J.T.  
6 Reinders<sup>4</sup> and George J. G. Ruijter<sup>1\*</sup>

7 <sup>1</sup> Department of Clinical Genetics, Erasmus Medical Centre, Dr. Molewaterplein 40, 3015 GD Rotterdam,  
8 The Netherlands; r.bonte@erasmusmc.nl; s.demirdas@erasmusmc.nl; h.j.blom@erasmusmc.nl;  
9 e.jacobs@erasmusmc.nl; r.hofstra@erasmusmc.nl

10 <sup>2</sup> Erasmus University Medical Center, Department of Pediatrics, Center for Lysosomal and Metabolic  
11 Diseases, Dr. Molewaterplein 40, 3015 GD Rotterdam, The Netherlands; e.oussoren@erasmusmc.nl;  
12 a.vanderploeg@erasmusmc.nl

13 <sup>3</sup> Erasmus University Medical Center, Center for Lysosomal and Metabolic Diseases, Department of  
14 Internal Medicine, Dr. Molewaterplein 40, 3015 GD Rotterdam, The Netherlands;  
15 m.wagenmakers@erasmusmc.nl

16 <sup>4</sup> Faculty of Electrical Engineering, Mathematics and Computer Science, TU Delft, Van Mourik  
17 Broekmanweg 6, 2628 XE, Delft, The Netherlands; M.J.T.Reinders@tudelft.nl

18 \* Correspondence: m.bongaerts@erasmusmc.nl; g.ruijter@erasmusmc.nl  
19

20 Received: date; Accepted: date; Published: date  
21

22 **Motivation:** Untargeted metabolomics is an emerging technology in the laboratory diagnosis of inborn  
23 errors of metabolism (IEM). In order to judge if metabolite levels are abnormal, analysis of a large number  
24 of reference samples is crucial to correct for variations in metabolite concentrations resulting from factors  
25 such as diet, age and gender. However, a large number of controls requires the use of out-of-batch controls,  
26 which is hampered by the semi-quantitative nature of untargeted metabolomics data, i.e. technical variations  
27 between batches. Methods to merge and accurately normalize data from multiple batches are urgently  
28 needed.

29 **Methods & results:** Based on six metrics, we compared existing normalization methods on their ability to  
30 reduce batch effects from eight independently processed batches. Many of those showed marginal  
31 performances, which motivated us to develop *Metchalizer*, a normalization method which uses 17 stable  
32 isotope-labeled internal standards and a mixed effect model. In addition, we propose a regression model  
33 with age- and sex as covariates fitted on control samples obtained from all eight batches. *Metchalizer*  
34 applied on log-transformed data showed the most promising performance on batch effect removal as well  
35 as in the detection of 178 known biomarkers across 45 IEM patient samples and performed at least similar

36 to an approach using 15 within-batch controls. Furthermore, our regression model indicates that 10-24% of  
37 the considered features showed significant age-dependent variations.

38 **Conclusions:** Our comprehensive comparison of normalization methods showed that our *Log-Metchalizer*  
39 approach enables the use out-of-batch controls to establish clinically-relevant reference values for  
40 metabolite concentrations. These findings opens possibilities to use large scale out-of-batch control samples  
41 in a clinical setting, increasing throughput and detection accuracy.

42 **Availability:** *Metchalizer* is available at <https://github.com/mbongaerts/Metchalizer/>

43

## 44 **Introduction**

45 Screening of patients suspected for inborn errors of metabolism (IEM) is currently based on measuring  
46 panels of specific groups of metabolites like amino acids or organic acids using a number of different tests  
47 and techniques such as ion-exchange chromatography, LC-MS/MS and GS-MS. This targeted approach  
48 with several different tests is time consuming and limited in the number of metabolites being analyzed.  
49 Untargeted metabolomics using High Resolution Accurate Mass Liquid Chromatography Mass  
50 Spectrometry (HRAM LC-MS) can detect hundreds to thousands of metabolites within one test, and, as a  
51 consequence, receives increasing interest to be used in IEM screening (Miller, et al., 2015) (Coene, et al.,  
52 2018) (Körver-Keularts, et al., 2018) (Haijes, et al., 2019) (Bonte, et al., 2019). Moreover, untargeted  
53 metabolomics can also reveal new biomarkers or increase our understanding of disease mechanism when  
54 exploited in epidemiological studies (Glinton, et al., 2019).

55

56 In traditional targeted diagnostic laboratory tests hundreds of reference samples are required to establish  
57 robust reference intervals. When using untargeted metabolomics the establishment of reference values is  
58 complicated due to the semi-quantitative nature of the data owing to several sources of variation like  
59 injection volume, retention time, temperature, or ionization efficiency in the mass spectrometer that cannot  
60 easily be amended. Moreover, these variations are even larger between different measurement runs in which  
61 a batch of samples is being measured simultaneously, hampering the resemblance between different  
62 batches. As a result, within-batch variation is smaller than between-batch variation. Therefore, to conquer  
63 these batch effects, current approaches include reference samples in each single batch of measurements  
64 (Miller, et al., 2015) (Coene, et al., 2018) (Haijes, et al., 2019) (Körver-Keularts, et al., 2018) (Bonte, et al.,  
65 2019) to improve detection sensitivity (due to tighter reference values as a result of lower variation in the  
66 in-batch reference samples).

67

68 Clearly, this reduces the throughput efficiency of IEM screening as the number of patient samples that can  
69 be included in a batch is considerably lower when the reference samples need to be measured as well. But,  
70 more importantly, the number of reference samples in one batch might fall short in the establishment of  
71 adequate reference ranges as variations in certain metabolites are not captured well enough in the relatively  
72 small reference panel. For example, factors like age, sex and BMI can affect abundancies of metabolites,  
73 and, to establish reliable reference ranges, one thus needs to correct for these factors by using a large number  
74 of reference samples (Chaleckis, et al., 2016) (Rist, et al., 2017) (Yu, et al., 2012). Consequently, for reliable  
75 untargeted metabolomics in clinical testing, a large set of reference samples is needed, while for throughput  
76 efficiency a small set is preferred. Altogether, this calls for an approach that can establish reference values  
77 based on reference samples being measured in several batches (out-of-batch controls).

78  
79 When relying on reference samples from different batches, one needs to correct for the batch effects to  
80 obtain reliable estimates for the reference ranges. This is generally solved by normalization methods and  
81 some have already been proposed within the context of untargeted metabolomics and mass spectrometry  
82 (Veselkov, et al., 2011) (Li, et al., 2017) (Välakangas, et al., 2016). Only a few groups have used out-of-  
83 batch controls to determine the reference values and used relatively simple normalization techniques like  
84 median scaling (Miller, et al., 2015), using a reference internal standard per metabolite (Körver-Keularts,  
85 et al., 2018) or using anchor samples (Glinton, et al., 2019). However, there has not been an extensive  
86 exploration of normalization techniques within the context of diagnostic testing for IEM's.

87  
88 We explore several known normalization methods on their ability to remove batch effects and to detect  
89 biomarkers from patients with known IEM. Furthermore, we introduce a new normalization method, which  
90 we called *Metchalizer*, which uses internal standards and a mixed effect model to remove batch effects. As  
91 this allows for a large set of (out-of-batch) reference samples, we also explore a regression model that uses  
92 age and sex as covariates to correct for potential age and sex effects on the reference values. Using the  
93 regression model combined with the *Metchalizer* normalization, we achieve similar performances in  
94 biomarker detection compared to the use of within-batch controls. Hence, this opens the possibility to  
95 increase the throughput of untargeted metabolomics in IEM screening as well as including more complex  
96 confounder strategies.

97  
98  
99

## 100 **Materials and methods**

101

### 102 **Untargeted metabolomics datasets**

103 Human plasma samples of 260 control samples and 53 IEM patients were measured over eight batches over  
104 the period 10-12-2018 to 03-05-2019 (Bonte, et al., 2019) having in total 33 unique IEMs. For every patient  
105 a technical triplicate was included. A QC (Quality Control) sample was included in all eight batches and  
106 more than four technical replicates were present in every batch. Since the QC sample was a commercial  
107 sample, the sample differed in concentration of several metabolites when compared to the (average)  
108 concentrations of the human plasma samples analyzed in these datasets. Features were annotated as  
109 described in Bonte et al. (Bonte, et al., 2019). Note that within each batch about 30 normal controls have  
110 been measured, which allows us to establish reference values based on within-batch controls, whereas the  
111 controls being measured for the other (seven) batches can be used for out-of-batch strategies. In this study  
112 we will refer to 'feature' as being either a single m/z-value (with unique retention time) or a merge of  
113 multiple features, where the adduct type and/or isotope was determined with corresponding neutral mass  
114 and consequently merged to a single feature.

115 The following internal standards have been added to each batch to facilitate normalization based on these  
116 internal standards: 1,3-<sup>15</sup>N uracil (+/-), 5-bromotryptophan (+/-), D<sub>10</sub>-isoleucine (+/-), D<sub>3</sub>-carnitine (+/-),  
117 D<sub>4</sub>-tyrosine (+/-), D<sub>5</sub>- phenylalanine (+/-), D<sub>6</sub>-ornithine (+), dimethyl-3,3-glutaric acid (+/-), <sup>13</sup>C-thymidine  
118 (+/-), D<sub>4</sub>-glycochenodeoxycholic acid (-), where + indicates positive ion mode, and – indicates the negative  
119 ion mode.

120

### 121 **Data processing**

122 Previous pre-processing steps (alignment, peak picking etc.) were performed per batch using Progenesis QI  
123 v2.4 (Newcastle-upon-Tyne, UK) (Bonte, et al., 2019). In-house software was developed to match features  
124 from each batch to a reference batch which in this case was the fifth batch when sorting on chronologically  
125 order. Chromatograms between batches were initially aligned to the reference batch by using lowess  
126 regression where features were matched based on retention time difference, m/z-value and median  
127 abundancy difference similar to the criteria described below.

128

129 Matching features was performed based on several criteria:

130

- 131 1) When features were annotated in reference batch and the batch being merged, these features were  
132 pooled to the merged dataset.
- 133 2) When MS/MS spectra were present for a potential matching pair of features, the cosine similarity  
134 metric was calculated and had to be  $> 0.8$ .
- 135 3) Retention time difference in percentage was calculated between potential matches, and had to be  $<$   
136  $2.5\%$ .
- 137 4) Progenesis QI determined per feature an isotope distribution and we required sufficient overlap of  
138 these distributions between potential matching pairs. This was determined by calculating a difference  
139 in percentage between each bin of this distribution. The maximum difference of these bins had to be  $<$   
140  $50\%$ .
- 141 5) As we expect matching features to have similar within-batch median abundancies (despite of batch  
142 effects), we calculated the differences between these medians in percentages, which had to be  $< 300\%$ .
- 143 6) Neutral masses were known for the matching pair but not the MS/MS spectra, the ppm-error had to be  
144  $< 1$ .
- 145 7) m/z-values were known for the matching pair but not the MS/MS spectra and neutral masses, the ppm-  
146 error of between the m/z-values had to be  $< 1$ .

147  
148 Features matching multiple other features in the reference batch were discarded (and vice versa). The  
149 resulting merged dataset contained only features which were matched across all eight batches.

150

### 151 **Quantitative evaluation set**

152 For the evaluation of the normalization methods, the following 16 metabolites were quantitatively ( $\mu\text{mol/L}$ )  
153 measured in two separate assays: leucine (+/-), C0 | L-carnitine (+/-), methionine (+/-), C2 | acetylcarnitine  
154 (+), 5-aminolevulinic acid/4-hydroxyproline (+), serine (+/-), citrulline (+/-), aspartic acid (+), glutamine  
155 (+/-), (allo)isoleucine (+/-), proline (+/-), tyrosine (+), phenylalanine (+/-), taurine (+/-), asparagine (+/-),  
156 arginine (+/-). Amino acids were determined by ion-exchange chromatography according to protocols  
157 described by the manufacturer (Biochrom). Free carnitine and acylcarnitines analysis was performed as  
158 described by Vreken et al. (Vreken, et al., 2002).

159

160

161

162 **Normalization methods**

163

164 **Initial transformations**

165 Prior to normalization raw abundancies were for some methods transformed using a log-transform or Box-  
166 Cox transformation. The latter was given by:

167

$$\hat{y} = \frac{(y + \lambda_2)^{\lambda_1} - 1}{\lambda_1} \quad (1)$$

168

169 with  $\lambda_1 = 0.5$  and  $\lambda_2 = 1$ . If an initial transformation was applied this was indicated in the name of the  
170 (normalization) method, where ‘BC-’ refers to the Box-Cox transformation and ‘Log-’ to the log  
171 transformation. When no transformation was performed this was indicated with ‘None-’.

172

173 **Normalization by Metchalizer**

174 *Metchalizer* assumes a linear mixed effect relationship between the abundancies of the internal standards  
175 and the feature of interest. Since the internal standards were expected to be correlated, we represented them  
176 by an orthogonal set of covariates. These covariates are obtained as the Latent Variables (LV) from the  
177 Partial Least Squares (PLS) of the set of internal standard abundancies (represented in matrix  $\mathbf{X}$ ) and the  
178 (categorical) information about which sample belonged to which batch (represented by matrix  $\mathbf{Y}$ ). The  
179 number of LV's were chosen from the metric  $I(K)$ :

180

$$I(K) = \sum_{k=1}^K \sum_{b,i} \left( x_{ib}^{LV_k} - \bar{x}_{.b}^{LV_k} \right)^2 \quad (2)$$

181

182

183 where  $\bar{x}_{.b}^{LV_k}$  is the center of batch  $b$  in the direction of  $LV_k$ . We selected that  $K$  for which  $I(K)$  reached 75  
184 % of its maximum value.

185

186 The mixed effect model then considers the LV's as fixed effects and all variations not explained by the LV's  
187 is considered as (random) batch effects:

188

$$\hat{y}_{ijb} = \beta_j^0 + \sum_k \beta_j^k x_i^{LV_k} + \gamma_{jb} + \epsilon_{ijb} \quad (3)$$

189

190 with  $x_i^{LV_k}$  indicating the covariate (score) of the  $k^{\text{th}}$  Latent Variable (LV) of sample  $i$ .  $\gamma_{jb}$  is the (random)  
191 batch intercept for feature  $j$ . Note, that when the LV's are sufficient in explaining  $y_{ijb}$  the random intercept  
192  $\gamma_{jb}$  will not contribute much. Before fitting the model, we remove outlier samples per batch  $b$  and feature  
193  $j$  based on their within-batch Z-score ( $|Z| > 2$ ) determined from all samples in that batch. These Z-scores  
194 were different than the Z-scores defined in other parts of this study.

195

196 The batch corrected abundancy then becomes:

197

$$198 \quad y_{ijb}^{\text{batch corrected}} = y_{ijb} - \hat{\gamma}_{ijb} + \text{Median}(\hat{\gamma}_{.jb}) \quad (4)$$

199

200

### 201 **Normalization by Best Correlated Internal Standard**

202 The internal standard,  $m$ , that best correlates with a feature  $j$  is being used to normalize the abundances of  
203 feature  $j$ . The correlation is measured within each batch using the spearman correlation between feature  $j$   
204 and each internal standard individually across all samples and subsequently averaged across all eight  
205 batches. The internal standard which (positively) correlated the best was used for normalization according:

206

$$207 \quad \hat{\gamma}_{ij} = \frac{y_{ij}}{y_{im}} \text{Median}(y_{.m}) \quad (5)$$

208 with  $m$  being the best correlated internal standard.

209

### 210 **Normalization methods from literature**

211 We compared *MetChalizer* with a number of different normalization methods. For a description we refer to  
212 the original articles, here we only specify our settings:

213 **Anchor** (Glinton, et al., 2019): *Anchor* assumes a linear response between the features in the anchor  
214 samples and samples in the batch. An anchor sample is a fixed sample which is analyzed in all eight batches,  
215 and was included more than four times in each batch. Normalization was performed per batch by dividing  
216 each feature by the median of the anchor samples for that same feature per batch [1]. In this study we used  
217 our QC samples as the anchor samples.

218 **CRMN** (Redestig, et al., 2009) : We used function `normFit` from the *crmn* R package with input argument  
219 "`crmn`" and `ncomp=3`. As a design matrix we chose QC samples versus human plasma's.

220 **EigenMS** (Karpievitch, et al., 2015) : QC samples and plasma samples were treated as two different groups.  
221 We chose three ‘eigentrends’.

222 **Fast Cyclic Loess** (Ballman, et al., 2004) : We used the *normalizeCyclicLoess* function from the *limma* R  
223 package using the method “fast” and `span=0.7`.

224 **NOMIS** (Sysi-Aho, et al., 2007) : We used the function *normFit* from the *crmn* R package with input  
225 argument “nomis”.

226 **PQN** (Filzmoser & Walczak, 2014) : *PQN* was implemented as described by Filzmoser et al. The reference  
227 spectrum was given by the median of every feature *j*.

228 **RUV** (Livera, et al., 2015) : We used the function *RUVRand* with `k=8` from the *MetNorm* R package.

229 **VSN** (Huber, et al., 2002) : We used the *vsn* R package using the *vsn2* function.

230

## 231 **Evaluation of normalization methods**

232 Six metrics were used to evaluate the performance of normalization methods.

233 **WTR<sub>j</sub> score**: The WTR score (**W**ithin variance **T**otal variance **R**atio) calculates the ratio between the  
234 ‘overall’ within-batch variance and the total variance from the QC samples:

$$235 \text{WTR}_j = \frac{\sigma_{j,\text{within}}^2}{\sigma_{j,\text{tot}}^2} = \frac{\sigma_{j,\text{tot}}^2 - \sigma_{j,\text{between}}^2}{\sigma_{j,\text{tot}}^2} \quad (6)$$

236 where  $\sigma_{j,\text{between}}$  is the variance of all eight batch averages for metabolite *j* in the QC samples, and  $\sigma_{j,\text{tot}}^2$   
237 the ‘overall’ variance based on all QC samples. The WTR score is between 0 and 1. As we would like batch  
238 averages to be similar for the QC samples (resulting in  $\sigma_{j,\text{between}}$  approaching zero), we are interested in  
239 WTR scores close to one.

240

241  **$\Delta R$  score**: Since normalization might also lead to the removal of variations of interest (for example  
242 biological variations), we tested whether the ranks of the features ordered by their abundancies within the  
243 QC samples were preserved after normalization. Per feature *j*, we determined the average rank the feature  
244 is assigned across all QC samples (across all batches) for both the raw abundancies ( $\bar{R}_j^{\text{raw}}$ ) as well as the  
245 normalized abundancies ( $\bar{R}_j^{\text{normalized}}$ ). The  $\Delta R_j$  score then looks at the difference in rank positions due to  
246 normalization per feature *j*:

247



248 
$$\Delta R_j = |\bar{R}_j^{\text{raw}} - \bar{R}_j^{\text{normalized}}| \quad (7)$$

249  $\Delta R_j \in [0, p]$ , with  $p$  the number of features. Lower  $\Delta R_j$  values indicate a better preservation of the ranks  
250 of the normalization method.

251 **Spearman score:** For the set of 16 quantitatively measured metabolites, we calculated the Spearman  
252 correlation between their quantitative measurements and the normalized abundancies. Overall  
253 normalization performance could be judged based on the median Spearman score of these 16 scores, having  
254 scores  $\in [-1, 1]$ . Higher values indicate better resemblance with the quantitative measurements.

255 **R<sup>2</sup> score:** The R<sup>2</sup> between the quantitative measurements and the normalized abundancies of the 16  
256 quantitatively measured metabolites. Overall performance could be judged from the median R<sup>2</sup> score, with  
257 scores  $\in [0, 1]$ . Higher values indicate better (linear) fits with the quantitative measurements.

258 **QC prediction score:** Since the QC samples were different from the human plasma samples in terms of  
259 concentrations for several metabolites/features, we expect this difference to be observed in the first few  
260 principal components (PCs) of a Principal Component Analysis (PCA) analysis applied to all features (excl.  
261 standards). We fitted a logistic function using the first four PC's as covariates and with class labels: 'human  
262 plasma' and 'QC'. The fitted model returns per sample a probability of belonging either to the class 'human  
263 plasma' or 'QC'. The probabilities for all samples are averaged into the *QC prediction score*  $\in [0, 1]$   
264 Increasing normalization performances should result in higher scores, as QC - and human plasma samples  
265 should be nicely separated. We used *LogisticRegression* from the Python package *scikitlearn* with  
266 parameters `penalty='l1', solver='saga', multi_class='auto', max_iter=10000`  
267 (Pedregosa, et al., 2011).

268 **Batch prediction score:** Increasing normalization performances should result in less batch clustering when  
269 examining the first few PC's of the PCA analysis (see *QC prediction score*). We fitted a logistic function  
270 for each batch versus all other seven batches using the first four PC's as covariates and obtained the  
271 probability scores for all human plasma's having the correct batch label. These scores were than averaged  
272 for all human plasma samples into a *batch prediction scores*  $\in [0, 1]$ . Scores closer to 1 indicate decreased  
273 normalization performances since batch separation is (still) present.

274

## 275 **Methods to determine aberrated metabolic abundancies**

276 Reference values for metabolites were determined by using a Z-score methodology: a set of reference values  
277 was Z-transformed (corrected for mean and divided by the standard deviation) which was then assumed to  
278 be normally distributed. Aberrations can then be called by considering significant Z-scores using a chosen  
279 cutoff level. We use four different methods to determine the Z-scores.

280 **Method 15in: best matching controls within batch:** Z-scores were calculated by selecting 15 control  
281 samples originating from the same batch as the patient based on age and sex as described in Bonte et al.  
282 (Bonte, et al., 2019).

283  
284 **Method 15out: best matching controls from other batches:** Z-scores were calculated similarly as in  
285 *method 15in* using explicitly 15 out-of-batch controls. Note, that since there are more out-of-batch controls  
286 than within-batch controls that age and sex matching can be done more accurately.

287  
288 **Method All controls:** This method used all available control samples from all eight batches, including  
289 within-batch controls, for Z-score calculation.

290  
291 **Method Regression:** We fitted a linear model on all 260 available controls excluding outliers which were  
292 first removed based on their within-batch  $|Z\text{-score}| > 3$ , this Z-score is different from other Z-scores  
293 mentioned in this study, and only used to remove outliers. The regression model is given by:

$$\hat{y}_i = \hat{\beta}^{\text{Intercept}} + \hat{\beta}^{\text{Sex}} x_i^{\text{Sex}} + \hat{\beta}^{\text{Sex, Age}} x_i^{\text{Sex}} x_i^{\text{Age}} + \sum_{p=1}^P \hat{\beta}_p^{\text{Age}} (x_i^{\text{Age}})^p + \hat{\epsilon}_i \quad (8)$$

$$\hat{y}_i = \vec{x}_i^T \vec{\hat{\beta}} + \hat{\epsilon}_i \quad (9)$$

297  
298 where  $\hat{y}_i$  is the predicted (normalized) abundancy of feature  $j$  for sample  $I$ ,  $\hat{\beta}^{\text{Intercept}}$  is an intercept.  $\hat{\beta}^{\text{Sex}}$ ,  
299  $\hat{\beta}^{\text{Sex, Age}}$  (interaction) and  $\hat{\beta}_p^{\text{Age}}$  indicate slopes.  $P$  is the degree of the polynomial used for regression on age  
300 and set to  $P=3$  in this study.  $x_i^{\text{Sex}}$  is 1 for women and 0 for men.  $\hat{\epsilon}_i$  is the estimated error. The latter  
301 expression is the model in vector notation with  $\vec{x}_i^T = [1, x_i^{\text{Sex}}, \dots, (x_i^{\text{Age}})^P]$ .

302  
303  
304

305 The coefficients were determined from the OLS estimator:

306

$$307 \quad \vec{\hat{\beta}} = (\mathbf{X}^T \mathbf{X})^{-1} \mathbf{X}^T \vec{y} \quad (10)$$

308

309 where the rows of  $\mathbf{X}$  are given by  $\vec{x}_i^T$  and the variance in  $\hat{y}_i$  is determined by the variance in  $\vec{\hat{\beta}}$  and the  
310 variance in  $\hat{\epsilon}_i$ :

311

$$312 \quad \begin{aligned} \text{Var}[\hat{y}_i] &= \text{Var} \left[ \vec{x}_i^T \vec{\hat{\beta}} \right] + \text{Var}[\hat{\epsilon}_i] \\ &= \vec{x}_i^T \text{Cov}[\vec{\hat{\beta}}] \vec{x}_i + \hat{\sigma}_i^2 \end{aligned} \quad (11)$$

313

314 The covariance matrix of  $\vec{\hat{\beta}}$  is given by:

315

$$316 \quad \begin{aligned} \text{Cov}[\vec{\hat{\beta}}] &= \text{Cov}[\beta + (\mathbf{X}^T \mathbf{X})^{-1} \mathbf{X}^T \vec{\epsilon}] \\ &= (\mathbf{X}^T \mathbf{X})^{-1} \mathbf{X}^T \text{E}[\vec{\epsilon} \vec{\epsilon}^T] \mathbf{X} (\mathbf{X}^T \mathbf{X})^{-1} \end{aligned} \quad (12)$$

317

318

319 with  $\text{E}[\vec{\epsilon} \vec{\epsilon}^T]$  estimated according:

320

$$321 \quad \text{E}[\vec{\epsilon} \vec{\epsilon}^T] = \begin{bmatrix} \hat{\sigma}_1^2 & 0 & \dots & 0 \\ 0 & \hat{\sigma}_2^2 & \dots & 0 \\ \vdots & \vdots & \ddots & \vdots \\ 0 & 0 & \dots & \hat{\sigma}_N^2 \end{bmatrix} \quad (13)$$

322

323 Since we expected  $\sigma_i^2$  to be dependent on age (neglecting sex), we do estimate  $\hat{\sigma}_i^2$  differently from a  
324 weighted mean on the squared residuals:

325

$$326 \quad \begin{aligned} \hat{\sigma}_i^2 &= \sum_{k=1}^N \frac{w_k(x_i^{\text{Age}})}{\sum_{k'=1}^N w_{k'}(x_i^{\text{Age}})} (y_k - \hat{y}_k)^2 \\ w_k(x_i^{\text{Age}}) &= \exp \left( -\frac{|x_i^{\text{Age}} - x_k^{\text{Age}}|}{a + b x_i^{\text{Age}}} \right) \end{aligned} \quad (14)$$

327 where  $a$  and  $b$  determine how the weights decay ( $a$ ) or increase ( $b$ ) over age (we set  $a, b = 1$  years). Z-  
328 scores were obtained by subtracting the predicted average  $\hat{y}_i$  and dividing by the variance  $\text{Var}[\hat{y}_i]$   
329 (Equation 11).

330

331 **Significance of regression coefficients:** Significance of the regression coefficients (Equation 8, 9) was  
332 obtained by considering the statistic:

$$\frac{(\hat{\beta}_i - \beta_i)}{\sqrt{\text{Var}[\hat{\beta}_i]}} \sim \mathcal{N}(0, 1) \quad (15)$$

333

334 The variances of the coefficients were found in the diagonal elements of  $\text{Cov}[\vec{\hat{\beta}}]$  (Equation 13). We tested  
335 the hypotheses that  $\beta_i = 0$  with a two-tailed test. A robust p-value was obtained from a bootstrap procedure  
336 by taking the median p-value from a series of p-values obtained from 50 bootstraps on the above test  
337 statistics taking 95 % of the data each bootstrap.

338

### 339 **Final Z-scores**

340 Since the patient samples were measured in triplicate, we determined the final Z-scores from the average  
341 of these three Z-scores (Bonte, et al., 2019). These average Z-score were determined for all Z-score  
342 methods i.e. *15in, 15out, All controls, Regression* and IEM patient.

343

### 344 **P-values from Welch's t-test**

345 As an alternative to using the (average) Z-scores we also considered the p-values obtained from the Welch's  
346 t-test to be informative, as it indicates whether the mean of triplicates differs significantly from the  
347 population average. Note that the triplicate was expected to have only technical variance whereas the  
348 reference population has variance consisting of technical- plus biological variance. For every Z-score  
349 method (*15in, 15out, All controls, Regression*) these p-values were obtained per feature (and patient).

350

351 When using the regression model, we used an adjusted Welch's t-test assuming that variance in the estimate  
352 of the average of the population (which is  $Z=0$ ) was negligible :

$$t_j = \frac{\text{Mean}(Z_{j.})}{\sqrt{\frac{s_j^2}{3}}} \quad (16)$$

353

354

355 where  $s_j$  is the sample standard deviation of the triplicate Z-scores,  $\text{Mean}(Z_{j.})$  indicates the average of the  
356 triplicate for feature  $j$ .

357

### 358 **Detection of the expected IEM biomarkers**

359 To explore how normalization and the method of determining these Z-scores (*15in*, *15out*, *All controls* and  
360 *Regression*) affected the detection of biomarkers, we plotted the number of detected biomarker of the  
361 known IEM patients against the average number of detected features per patients for various (final) Z-score  
362 and p-value cutoff levels, similar to a ROC curve. Improved biomarker detection was believed to increase  
363 the area under the ROC(-like) curve (AUC).

364

365 Establishing this ROC curve was done by assigning a status for every biomarker (if present and annotated  
366 in the MS-data). A database was established containing the expected biomarkers for each IEM including  
367 the expected Z-score sign (up or down regulated) as can be found in supplement S5 Table 5. For every IEM  
368 patient, we assigned for all expected biomarkers the status ‘positive’ or ‘negative’. The status ‘positive’  
369 was assigned when 1)  $|Z\text{-score}| > Z_{\text{abnormal}}$ , and 2) the sign of the Z-score corresponded with the expected  
370 sign for that biomarker in the IEM patient. Criteria 1 and 2 were also used for the ROC-curve created by  
371 the p-values. When a biomarker was found in both positive and negative ion mode, the Z-score(s) from the  
372 mode having the largest population average abundancy was taken. The average number of detected features  
373 (per patient) was obtained by considering features from both ion modes.

374

375 Some of the expected biomarkers were not matched across all eight batches and therefore were absent in  
376 the merged dataset and analysis in this study. In the merged dataset, we obtained 178 patient-biomarker  
377 combinations (one patient could have multiple biomarkers) associated with 45 patients (hence, for 8 IEM  
378 patients no biomarkers were found in the merged dataset).

379

380

381

382

383

## 384 Results

385

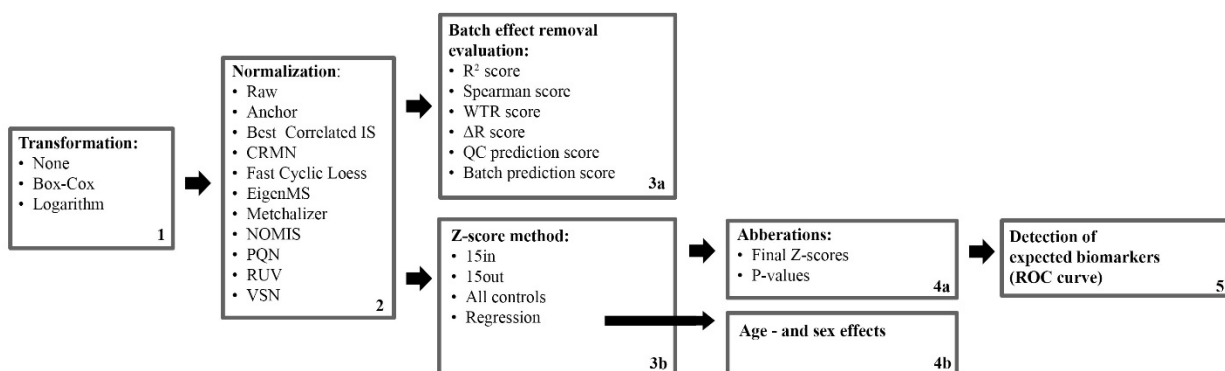

386

387

388 Figure 1. Flow diagram of different methods used in this study. 1) An initial transformation was applied. 2) A normalization  
389 method was applied. 3a) Multiple metrics were calculated to investigate batch effect removal. 3b) Normalized data was used  
390 to determine Z-scores for IEM patients using different (control) reference methods. 4a) Final Z-scores were calculated  
391 together with p-values. 4b) Regression analysis on all features/biomarkers was used to explore age- and sex dependency of  
392 abundancies. 5) Detection of the expected biomarkers was investigated using a ROC-like curve for Z-scores and p-values

392

393

### 394 Batch characteristics

395 Eight untargeted metabolomics runs/batches were merged containing 260 control samples and 53 IEM  
396 patients, together having 33 unique IEMs. After merging, 773 positively ionized features were obtained,  
397 among which 121 were annotated, and 598 negatively ionized features were attained with 106 annotated  
398 features. We only included features which were merged across all eight batches to ensure consistency  
399 among the findings. Intra-batch coefficients of variation (CV) on 17 (internal and external) standards were  
400 smaller (median CV=14%) than inter-batch CV's (median CV=27%) indicating that batch effects were  
401 present (for more details see S1). Principle Component Analysis (PCA) further elucidated the presence of  
402 batch effects as shown in Figure 2A, showing the first three PC's for the log-transformed raw abundancies  
403 (*Log-Raw*).

404

405

### 406 Comparing normalization methods

407 We investigated the performance of several normalization methods on batch effect removal by evaluating  
408 multiple metrics based on quantitative measurements, the Quality Control (QC) samples and PCA analysis

409 (see Methods and Figure 1). Some normalization methods were excluded from the following analysis  
410 because of their marginal performance on the considered metrics (as evaluated in supplement S2).

411  
412 *Reduced batch effects:* We visually observe in the PCA plots that most normalization methods reduced  
413 batch effects since batch clustering seemed to be reduced after normalization (Figure 2), and is confirmed  
414 when looking at the *batch prediction score* (Figure 3A) showing lower scores for normalized abundancies  
415 when compared with the raw data (*None-Raw* or *Log-Raw*). *BC-Metchalizer*, *Log-Metchalizer* and *None-*  
416 *Anchor* had the lowest *batch prediction scores*, with a median score of 0.13 (0.13), 0.14 (0.14), 0.17 (0.16)  
417 for positive (negative) ion mode respectively.

418  
419 *Improved separation of QC samples:* QC samples (squares in Figure 2) were included in every batch and  
420 were expected to separate from the human plasma samples (squares vs circles in Figure 2) in the first four  
421 Principle Components (PC) due to overall abundancy differences for several metabolites. Normalization  
422 should maintain this separation which was measured by the *QC prediction score* (Figure 3B). *Log-CRMN*  
423 conserved QC/plasma separation, with a median *QC prediction score* of 1.00 (1.00) for positive (negative)  
424 ion mode, but was less able to reduce batch effects since it had a median *batch prediction score* of 0.76  
425 (0.39) for positive (negative) ion mode respectively. *Log-NOMIS* and *Log-RUV* were better in reducing  
426 batch effects, with a median *batch prediction score* of 0.21 (0.21), 0.24 (0.19) for positive (negative) ion  
427 mode respectively, but were less able to conserve the separation between QC and human plasma samples,  
428 since the median *QC prediction scores* were 0.32 (0.88) and 0.39 (0.94) for positive (negative) ion mode  
429 respectively. It is therefore likely that these two methods removed variations other than batch related  
430 variation. QC samples were almost perfectly separated from the human plasma sample by *BC-Metchalizer*,  
431 *Log-Metchalizer* and *None-Anchor*.

432  
433 *Resemblance with quantitative measurements:* To further quantify batch effect removal, we calculated the  
434 Spearman score and  $R^2$  score between quantitative plasma concentrations (in  $\mu\text{mol/L}$ ) and the normalized  
435 abundancies of our evaluation set of amino acids and (acyl)carnitines (Methods). To ensure high signal-to-  
436 noise ratio's in the quantitative measurements, we selected only metabolites having a population average  
437 concentration above 1  $\mu\text{mol/L}$ . Matching this evaluation set with the annotated features in the untargeted  
438 metabolomics data resulted in 16 and 13 metabolites in positive - and negative ion mode, respectively.  
439 Figure 3C and D shows both metrics for the investigated normalization methods. Again, for most  
440 normalization methods both metrics improved when compared to the raw data (*None-Raw*). *BC-*  
441 *Metchalizer*, *Log-Metchalizer* and *None-Anchor* appeared to perform the best on these metrics with median

442  $R^2$  scores of 0.56 (0.55), 0.57 (0.54), 0.57 (0.47), and median Spearman scores of 0.75 (0.74), 0.74 (0.79),  
443 0.73 (0.71), respectively, for positive (negative) ion mode.

444  
445 *Reduced between-batch variation in QC samples:* Next, we compared the within-batch variance of the QC  
446 samples with respect to the total variance which is expressed by the WTR score (Methods) for each  
447 normalization method. WTR scores close to 1 indicate the absence of batch effects. *None-Raw* and *Log-*  
448 *Raw* had low WTR scores and after normalizing these scores increased (Figure 2E). *BC-Metchalizer* and  
449 *Log-Metchalizer* scored among the highest on this WTR score. *None-Anchor* had high WTR scores, but  
450 since *None-Anchor* uses the QC samples for normalization the WTR scores are biased towards higher  
451 values.

452  
453 *Preserved feature ranks in QC samples:* Removal of variation results in higher WTR scores but potentially  
454 removes also variation(s) of interest. Therefore, we investigated whether the ranks of the abundancies of  
455 the different features in the QC samples remained the same as in the raw data (expressed as the QC rank  
456 differences,  $\Delta R$ , see Methods for details). A lower rank difference indicates that metabolic differences  
457 present in the QC samples were conserved after normalization. Figure 2F shows the QC rank differences  
458 for each normalization method. These results confirm the previous believe that *Log-NOMIS* and *Log-RUV*  
459 also removed non-batch related variations (higher  $\Delta R$ ), since they had relatively high  $\Delta R$ 's. *BC-*  
460 *Metchalizer* and *Log-Metchalizer* showed rank differences but were lower than most other competing  
461 methods. *None-Anchor* showed high QC rank differences, but this is again the result of the fact that *None-*  
462 *Anchor* uses the QC samples for normalization.

463  
464 Taken together, *BC-Metchalizer*, *Log-Metchalizer* and *None-Anchor* showed the most consistent  
465 improvement across the evaluation metrics.

466  
467  
468



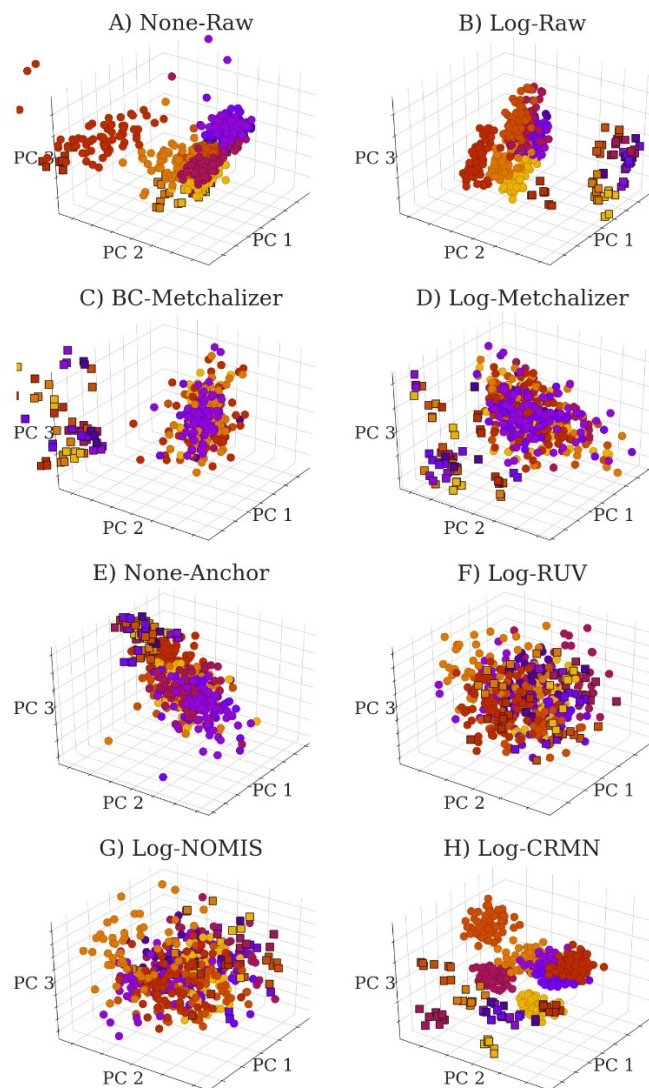

469

470 Figure 2. PCA plots for raw data and normalized data as indicated by the title of each panel. Each batch is indicated with a

471 unique color. PCA was performed on 758 features (excluding the internal – and external standards) in positive ion mode.

472 The squares indicate QC samples whereas the circles indicate patients and controls samples.

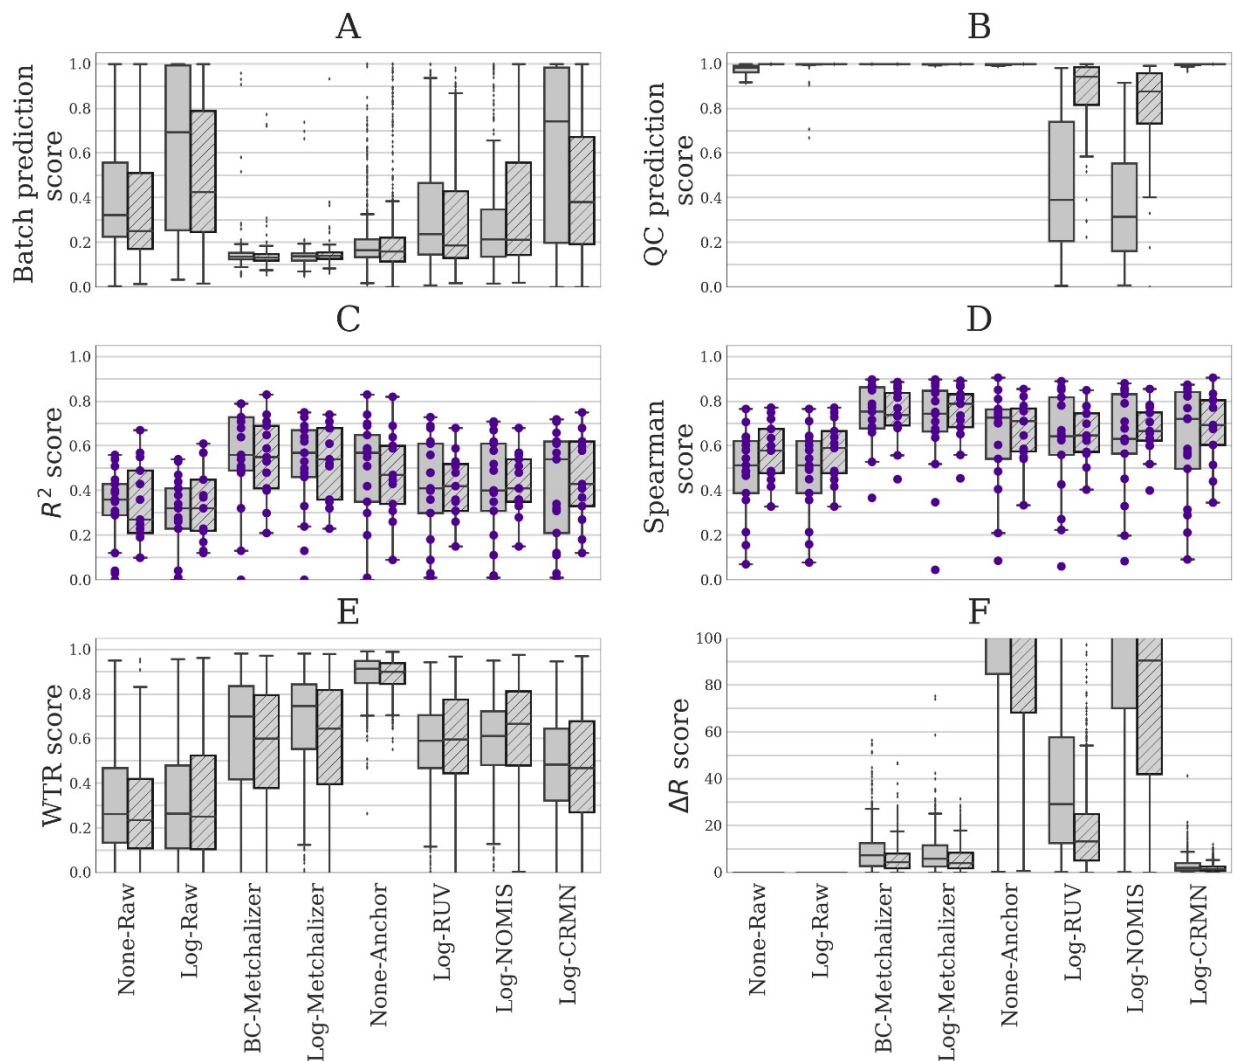

473  
 474 Figure 3. Six different performance metrics for batch effect removal (see Methods for more details). Data from positive – or  
 475 negative ion mode is indicated by plain and striped boxplots, respectively. A) *Batch prediction score* measures the presence  
 476 of batch effects in the first four PC's from PCA analysis. B) *QC prediction score* measures how well QC samples are  
 477 separated from human plasma sample in the first four PC's. C)  $R^2$  score between (normalized) abundancies and quantitative  
 478 measurements. D) Spearman score of (normalized) abundancies with quantitative measurements. E) The WTR score  
 479 measuring the overall within batch variation with respect to the total variance using the QC samples. F)  $\Delta R$  score  
 480 measuring the preservation of the rank of features based on their abundancy in the QC samples before and after  
 481 normalization.

482  
 483 **Confounder effects of age and sex**  
 484 To explore confounding effects of age and sex on metabolite abundancies, we developed a regression model  
 485 with sex as linear covariates and age as a polynomial ( $p=1,2,3$ ) covariate (see Methods). After  
 486 normalization, we fitted the model parameters for every feature using all control samples present in the

487 eight batches and determined the significance of the coefficients in the regression model (see Methods).  
 488 Table 1 shows the percentages of (strong) significant coefficients ( $\alpha = 2.7e^{-3}$ ) per ion mode and (selected)  
 489 normalization methods. Our findings suggest that 6-24% of all features showed age dependency when  
 490 looking at coefficient  $\hat{\beta}_1^{\text{Age}}$  (i.e. the linear term in the model). It is noteworthy that more age-related features  
 491 were found in the negative ion mode.

492  
 493 Age-dependent metabolites (supplement S3 Table S3), when using normalization by *BC-Metchalizer*,  
 494 include known IEM biomarkers, such as: guanidinoacetic acid(+), homoarginine(-) and N-acetyltyrosine(-  
 495 ), 2-ketoglutaric acid(-), citrulline(-) and ornithine(-). As an example, we plotted the regression model for  
 496 guanidinoacetic acid (Figure 3), illustrating that the Z-score for a fixed abundancy depends on age (and  
 497 slightly on sex at later ages). This also shows a non-linear trend with age. Our analyses showed that more  
 498 metabolites have significant non-linear trends over age ( $\hat{\beta}_2^{\text{Age}}$  and  $\hat{\beta}_3^{\text{Age}}$  in Table 1). Moreover, age dependent  
 499 features have the tendency to increase/decrease in abundancy faster for decreasing age, implying that a  
 500 matching reference population on younger ages seems to be more important (supplement S3 Figure 5).

501  
 502 Hardly any significant gender-related features were found (Table 1). When significance on  $\hat{\beta}^{\text{Sex, Age}}$  was  
 503 relaxed ( $\alpha = 0.05$ ), we found some biomarkers showing an interaction between age and sex, such as:  
 504 malonic acid(+/-), guanidinoacetic acid(+), homoarginine(-), ornithine(-), sebacic acid(+/-). See  
 505 supplement S3 Table 4 for a full list.

506  
 507  
 508 Table 1. Percentage of strongly significant ( $\alpha = 2.7e^{-3}$ ) regression coefficients of the covariates age and sex when using  
 509 the regression model (Methods) predicting 758 positively - and 583 negatively ionized features, for the different  
 510 normalization method and ion modes.

| Normalization method   | Ion mode | $\hat{\beta}^{\text{Intercept}}$ (%) | $\hat{\beta}_1^{\text{Age}}$ (%) | $\hat{\beta}_2^{\text{Age}}$ (%) | $\hat{\beta}_3^{\text{Age}}$ (%) | $\hat{\beta}^{\text{Sex}}$ (%) | $\hat{\beta}^{\text{Sex, Age}}$ (%) |
|------------------------|----------|--------------------------------------|----------------------------------|----------------------------------|----------------------------------|--------------------------------|-------------------------------------|
| <i>None-Anchor</i>     | -        | 97                                   | 15                               | 6                                | 4                                | 0                              | 1                                   |
| <i>None-Anchor</i>     | +        | 99                                   | 6                                | 4                                | 2                                | 0                              | 0                                   |
| <i>BC-Metchalizer</i>  | -        | 100                                  | 23                               | 12                               | 8                                | 0                              | 1                                   |
| <i>BC-Metchalizer</i>  | +        | 100                                  | 11                               | 6                                | 4                                | 0                              | 0                                   |
| <i>Log-Metchalizer</i> | -        | 100                                  | 24                               | 15                               | 10                               | 1                              | 0                                   |
| <i>Log-Metchalizer</i> | +        | 100                                  | 10                               | 6                                | 4                                | 0                              | 0                                   |

511

512

513

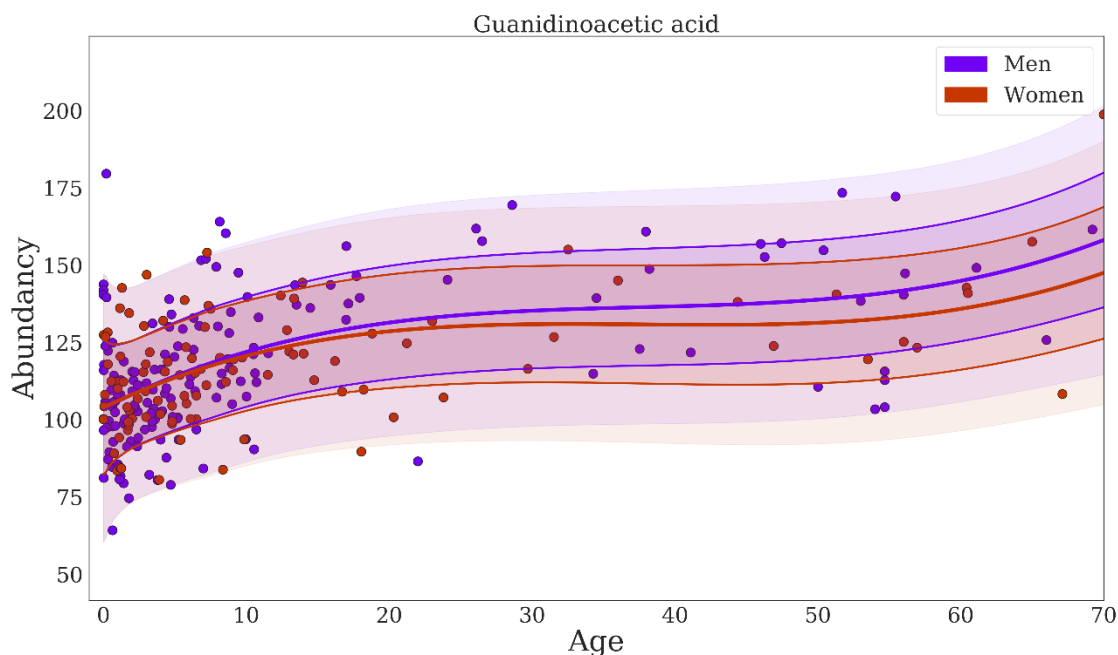

514

515 Figure 1. Regression of guanidinoacetic acid when using *BC-Metchalizer* normalized data. The different colors indicate the  
516 sex as shown in the legend. The thick red/blue line indicates the average obtained from the fit on all controls for a given sex.  
517 The first standard deviation is indicated by the thin(ner) line whereas the second standard deviation ends at the shaded region.

518

### 519 **Detection of the expected IEM biomarkers**

520 Next we investigated the impact of normalization and using out-of-batch controls on expected biomarker  
521 detection in the 45 IEM patients by plotting the number of detected expected biomarkers against the average  
522 number of positives features per patient at various Z-score or p-value thresholds (Methods), similar to a  
523 Receiver Operator Curve (ROC). Untargeted metabolomics did not allow us to make a distinction between  
524 false positives (FP) and true positives (TP), due to unannotated features and even unknown disease related  
525 features/biomarkers. Assuming that the majority of the positives per patient are false positives, we used  
526 the average number of positives per patient as proxy for the false positives. Improved performance was  
527 considered to increase the number of detected expected biomarkers (true positives of which we are certain)  
528 while lowering the average number of positives per patient, thereby increasing the Area Under the Receiver  
529 Operator Curve (AUC). We decided to take the method that uses 15 within-batch controls and raw  
530 abundancies (*15in&None-Raw*) as the reference approach, where the performance was expressed as a  
531 percentage of this reference AUC, named  $AUC_{15in\&None-Raw}^x$ . Here x indicates if the AUC was created from  
532 the average Z-scores or p-values. These p-values were obtained from the Welch's t-test which tests whether

533 the average Z-score of an expected biomarker or feature across the triplicate significantly differs from the  
534 average Z-score of the reference population (Methods).

535  
536 *Log-transform improves biomarker detection for p-values:* Our first observation is that, when considering  
537 the Z-scores, the log-transformed raw abundancies (*15in&Log-Raw*) has an AUC approximately equal to  
538  $AUC_{15in\&None-Raw}^Z$  (Figure 4), implying that this transformation hardly affected this performance metric.  
539 However, when using the p-values, the log-transformation improved the detection of the expected  
540 biomarkers, as  $AUC_{15in\&Log-Raw}^P$  is 8% higher than the  $AUC_{15in\&None-Raw}^P$  (Figure 4).

541  
542 *Reduced performance with age/sex matched out-of-batch controls:* When comparing the performance of  
543 using 15 out-of-batch controls (*15out&Raw*) to the *15in&Raw* reference, the performance for *15out* was  
544 clearly reduced (Figure 4 A), achieving only 80% of the reference  $AUC_{15in\&None-Raw}^Z$ . This difference was  
545 also present when looking at the p-values, resulting in a clear reduction of the  $AUC_{15out\&None-Raw}^P$  (74%).  
546 Hence, potential improved age/sex matching for *15out*, due to the increased number of available controls  
547 (supplement S4 Figure 6), did not result in improved performance, most likely due to the dominance of  
548 batch effects.

549  
550 *Normalization improves performance of age/sex matched out-of-batch controls:* After normalizing with  
551 *BC-Metchalizer*, *Log-Metchalizer* or *None-Anchor* and using 15 out-of-batch controls (*15out*), the  
552 performance increased when compared to *15out&None-Raw* (Figure 4 A, B and C), and came close to the  
553  $AUC_{15in\&None-Raw}^Z$ ; for *BC-Metchalizer* (94%) and *Log-Metchalizer* (96%), while *None-Anchor* stayed  
554 behind (90%). Interestingly, when considering biomarker detection performance using the p-values, *BC-*  
555 *Metchalizer* performed on par with *15in&None-Raw* (99%), *Log-Metchalizer* improved over *15in&None-*  
556 *Raw* (105%) and *None-Anchor* stayed behind (90%). *Log-Metchalizer* performed similar to *15in&Log-*  
557 *Raw* (105% and 108%, respectively), indicating that out-of-batch controls can be used instead of in-batch  
558 controls to determine reference values.

559  
560 *Regression model effectively models age and sex effects:* The regression model (*Regression*) slightly  
561 improved  $AUC^Z$  with respect to *15out* for *BC-Metchalizer* (+2%) and *None-Anchor* (+4%), but not for *Log-*  
562 *Metchalizer* (-1%), see also Figure 4 A, B and C. When considering the p-values,  $AUC^P$ , only *BC-*  
563 *Metchalizer* (+1%) improved but not *None-Anchor* (-2%) and *Log-Metchalizer* (-1%), although these  
564 performance differences in all cases were small (Figure 4 D, E and F). Interestingly, when we took all  
565 controls to determine the Z-scores (*All controls*, Methods), similar  $AUC^Z$  performances were observed when



566 compared to *Regression*, i.e. -1% for *BC-Metchalizer* and +2% *Log-Metchalizer* and +1% for *None-Anchor*.  
 567 When considering the p-values the difference were larger, i.e. -5% for *BC-Metchalizer* and -1% *Log-*  
 568 *Metchalizer*, and -5% for *None-Anchor*, suggesting an influence of age- and sex effects on the detection  
 569 of biomarkers.

570

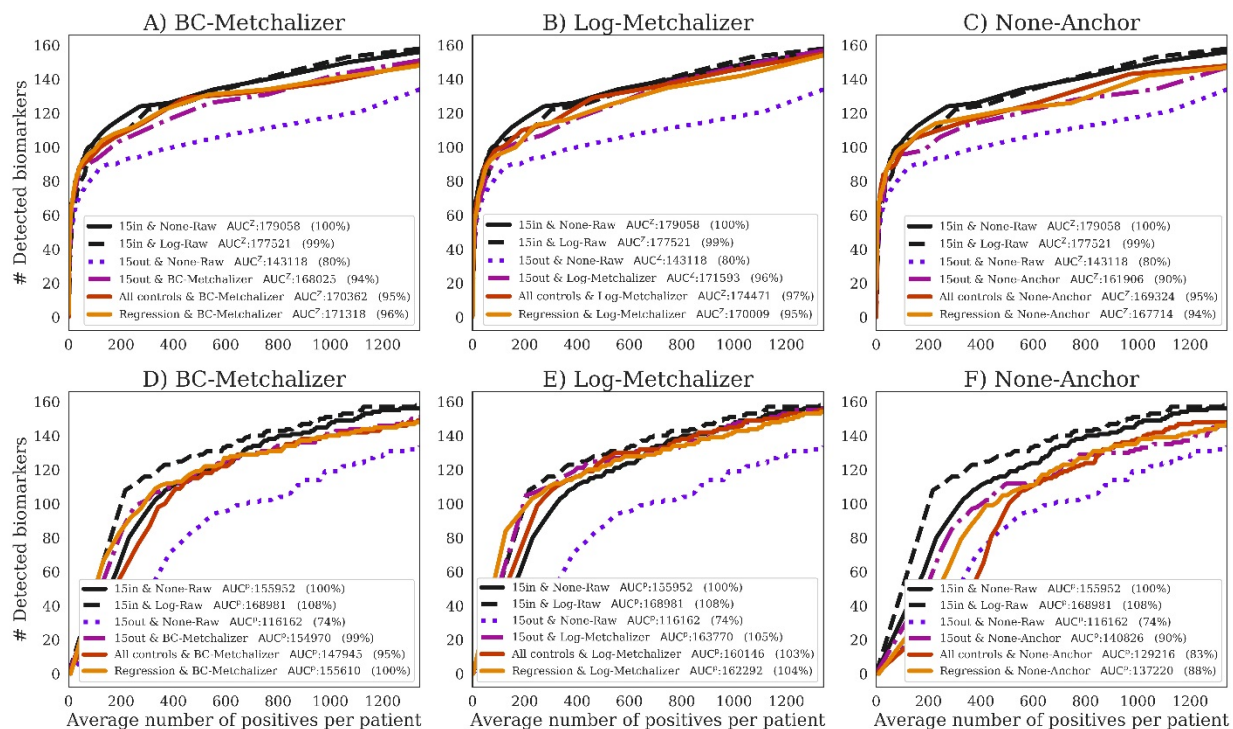

571

572

573 Figure 2. The number of detected expected biomarkers versus the average number of positives per patient. A curve in each  
 574 (sub)figure was formed by increasing the Z-score or p-values threshold ( $Z_{abnormal}$ , Methods). The legend indicates (per curve)  
 575 the methods used to determine Z-scores and how data was normalized, the AUC and AUC expressed as percentage of the  
 576  $AUC_{15in\&None-Raw}^Z$ . Performances using A) *BC-Metchalizer* using Z-scores, B) *Log-Metchalizer* using Z-scores, C) *None-*  
 577 *Anchor* using Z-scores, D) *BC-Metchalizer* using p-values, E) *Log-Metchalizer* using p-values, and F) *None-Anchor* using  
 578 p-values.

579

580

## 581 **Discussion**

582 Targeted measurements of metabolites in body fluids using various platforms such as HPLC, GC-MS and  
583 LC-MS/MS are traditionally applied for laboratory diagnosis of IEM. For each individual metabolite, age-  
584 and, sometimes, sex-dependent reference ranges are established using hundreds of reference samples.  
585 Untargeted metabolomics is a promising alternative enabling the determination of many metabolites in one  
586 analysis. This can speed up the diagnostic process and extends the number of different IEMs that can be  
587 screened in a single run. A major drawback of current approaches is that reference samples need to be  
588 included in the same experimental batch to ensure proper reference ranges (or Z-score transformations).  
589 Some methods do exist that use reference samples measured in different batches (out-of-batch controls) to  
590 determine age and sex corrected Z-scores, and they are based on normalizing methods that remove the batch  
591 effects. There has not been a comprehensive comparison of the different normalization methods with  
592 approaches that use out-of-batch controls, which we have set out in this work. Moreover, we developed a  
593 new normalization method, *MetChalizer*, that makes use of isotope-stable internal standards, an approach  
594 that has been shown to be useful when mapping specific metabolites to specific internal standards (Körver-  
595 Keularts, et al., 2018) which we generalize to all features measured. Because more reference samples are  
596 available when using the out-of-batch controls, we additionally propose a regression model that  
597 incorporates sex and age effects as (non-linear) covariates. Altogether, we have shown that our  
598 methodology has biomarker detection performances at least similar to using 15 within-batch controls.

599

600 Typically, around 20,000 features in both negative and positive mode were detected per batch. When we  
601 require a feature to have been measured (and matched) in all eight batches, we retained 598 positive and  
602 773 negative ionized features, respectively. As some normalization methods use a statistical approach  
603 (*PQN*, *Fast Cyclic Loess*), the reduction in features might explain the reduced performance of these  
604 methods. In addition, the requirement of features being measured (and matched) across all eight batches  
605 also resulted in the loss of some biomarkers, which hampered the performance of all out-of-batch methods  
606 with respect to the within-batch methods. As an alternative, we could have made the inclusion of features  
607 dependent on fewer batches (for example being present in >5 out of 8 batches). We decided not to do that  
608 as this would have resulted in an unequal number of control samples for the different features, leading to  
609 inconsistent results between the out-of-batch methods. The availability of more batches could have solved  
610 this issue because an equal number of control samples could likely be obtained per feature, even when these  
611 features were not present/matched in some batches. It is interesting to note that our proposed normalization  
612 method (*MetChalizer*) showed consistent performances when data from various number of batches is being  
613 used (supplement Figure S7). Some biomarkers, for example isobutyrylglycine, were only detected in the

614 batches having patients with elevated levels of these specific metabolites. We anticipate that for this kind  
615 of biomarkers out-of-batch strategies are not useful since abundancies in (healthy) controls are (very) low,  
616 thereby making Z-score calculation unsuitable.

617  
618 *Anchor* uses an anchor (fixed) samples, measured in all batches, to normalize the features. *Anchor*  
619 normalization on none-transformed data performed well when compared to most of the other normalization  
620 methods explored, but slightly less than *BC-Metchalizer* and *Log-Metchalizer* when considering the  
621 performance metrics Spearman score,  $R^2$  score, batch prediction score and performance on biomarker  
622 detection. We anticipate that the anchor samples may not correlate with all types of variation like, for  
623 example, injection volume which is a source of variation at the sample level, whereas the abundancy of the  
624 internal standards (used by *Metchalizer*) is directly linked to the injection volume. *Anchor* also assumes  
625 that metabolite levels remain constant over time in the anchor samples. As a consequence, if for example  
626 storage effects take place, *Anchor* is impeded. The use of *Anchor* may also be less practical because it  
627 requires the same anchor samples in every batch. The introduction of a new anchor sample requires an  
628 'overlapping batch' containing a set of both the former anchor sample together with the newly introduced  
629 anchor samples.

630  
631 *Metchalizer* exploits the linear relationship between the abundancy of a feature and those of the latent  
632 variables that are derived from the partial least squares between the internal standards and the features  
633 measured across all samples and capturing the covariance between the standards and the features (Methods).  
634 *Metchalizer* assumes that this relationship holds across batches and with that assumption determines (batch)  
635 intercepts that correct for the 'unexplained' batch/technical variations. Consequently, when such linear  
636 relationship between internal standards and features does not exist, the normalization would be fully based  
637 on the (batch) intercepts, deteriorating the power of this approach. Alternatively, when batch differences  
638 (represented by the intercepts) differ from each other due to biological variations between batches, this will  
639 be interpreted as 'unexplained' batch/technical variations, and consequently wrongly removed by  
640 *Metchalizer*. For this reason, it is important to use randomized control samples in every batch (in terms of  
641 age, sex etc) to minimize the possibility of biological variations between batches.

642  
643 *Log-Metchalizer* log transforms the abundancies before applying *Metchalizer*, whereas *BC-Metchalizer*  
644 uses a less strong Box-Cox transformation. The effect of this stronger transformation on most investigated  
645 metrics in this study was small, although we did observe that a stronger initial transformation led to  
646 improved biomarker detection performances when considering the p-values. *15in&None-Raw* had a lower  
647  $AUC^P$  than *15in&Log-Raw* and could therefore also explain the improved performance of *Log-Metchalizer*



648 over *BC-Metchalizer* on this metric. A simulation showed that log-transforming the raw abundancies indeed  
649 caused differences in the obtained Z-scores and p-values when compared to the raw abundancies  
650 (supplement S10). Positive Z-scores had relatively lower p-values (and vice versa) for log-transformed  
651 abundancies and this could therefore explain the improved performance on biomarker detection, since most  
652 of the considered biomarkers had positive Z-scores, thus biasing this performance metric. Increasing the  
653 number of internal standards did not improve the normalization performance when considering metrics  
654 based on the quantitative measurements, although we observed that certain combinations of internal  
655 standards improved normalization of specific metabolites (supplement S6). This suggests that *Metchalizer*  
656 might be improved by matching features/metabolites with a certain set of internal standards (for example  
657 based on retention time).

658  
659 We were a bit surprised that biomarker detection performance using the Z-scores ( $AUC^Z$ ) for the regression  
660 model was similar or slightly less than using all controls, as abundancies are known to be dependent on age  
661 and sex. One explanation might be that only a subset of the considered (expected) biomarkers have an age  
662 and/or sex dependency. Indeed, when we considered only these age-dependent biomarkers (19 biomarker-  
663 patient combinations, supplement S3 Table 3), the performance of *Regression* was more improved than *All*  
664 *controls* (supplement S8). However, this set was small, so substantial evidence to support this improvement  
665 is lacking. Furthermore, our proposed performance metric assumed that the average number of positives  
666 was a proxy for the average number of false positives. Using *Regression* resulted generally in more positives  
667 (data not shown), but these were not necessarily merely false positives, which therefore could have affected  
668 the performance of *Regression* negatively. Though, when judging biomarker detection using the p-values,  
669 we did see that *Regression* slightly outperformed *All controls*.

670  
671 In conclusion, out of all explored normalization methods, the removal of batch effects was best performed  
672 by *Log-Metchalizer*. Fitting our regression model on the corresponding normalized data showed that 10-  
673 24% (Table 1) of all considered features were depending on age, underlining the need for using age  
674 corrected Z-scores. On average, biomarker detection performance using *Log-Metchalizer* using out-of-  
675 batch controls was at least similar to the best performing *Log-Raw* approach when using the 15 within-  
676 batch controls (*15in&Log-Raw*). We anticipate that the success of *Metchalizer* and age- and sex correcting  
677 strategies such as our regression model depend on three factors: 1) a feature of interest being measured in  
678 a number of other batches (not necessarily all), 2) batch effects containing (only) technical variations, and  
679 3) abundancies being affected by age or other covariates (the presence of an effect-size). Together our  
680 proposed approach opens new opportunities to improve abnormality detection, especially for age-dependent  
681 features/biomarkers.

682

## 683 **References**

- 684 Ballman, K. V., Grill, D. E., Oberg, A. L. & Therneau, T. M., 2004. Faster cyclic loess: normalizing RNA  
685 arrays via linear models. *Bioinformatics*, 5, Volume 20, pp. 2778-2786.
- 686 Bonte, R. et al., 2019. Untargeted Metabolomics-Based Screening Method for Inborn Errors of  
687 Metabolism using Semi-Automatic Sample Preparation with an UHPLC- Orbitrap-MS Platform.  
688 *Metabolites*, 11, Volume 9, p. 289.
- 689 Chaleckis, R. et al., 2016. Individual variability in human blood metabolites identifies age-related  
690 differences. *Proceedings of the National Academy of Sciences*, Volume 113, pp. 4252-4259.
- 691 Coene, K. L. M. et al., 2018. Next-generation metabolic screening: targeted and untargeted  
692 metabolomics for the diagnosis of inborn errors of metabolism in individual patients. *Journal of*  
693 *Inherited Metabolic Disease*, Volume 41, pp. 337-353.
- 694 Filzmoser, P. & Walczak, B., 2014. What can go wrong at the data normalization step for identification of  
695 biomarkers?. *Journal of Chromatography A*, 10, Volume 1362, pp. 194-205.
- 696 Grinton, K. E. et al., 2019. Untargeted metabolomics identifies unique though benign biochemical  
697 changes in patients with pathogenic variants in UROC1. *Molecular Genetics and Metabolism Reports*,  
698 Volume 18, pp. 14-18.
- 699 Haijes, H. A. et al., 2019. Direct Infusion Based Metabolomics Identifies Metabolic Disease in Patients'  
700 Dried Blood Spots and Plasma. *Metabolites*, Volume 9.
- 701 Huber, W. et al., 2002. Variance stabilization applied to microarray data calibration and to the  
702 quantification of differential expression. *Bioinformatics*, 7, Volume 18, pp. S96--S104.
- 703 Karpievitch, Y. V. et al., 2015. Metabolomics Data Normalization with EigenMS. *PLOS ONE*, 12, Volume 9,  
704 pp. 1-10.
- 705 Körver-Keularts, I. M. L. W. et al., 2018. Fast and accurate quantitative organic acid analysis with LC-  
706 QTOF/MS facilitates screening of patients for inborn errors of metabolism. *Journal of Inherited*  
707 *Metabolic Disease*, Volume 41, pp. 415-424.
- 708 Lawton, K. A. et al., 2008. Analysis of the adult human plasma metabolome. *Pharmacogenomics*, Volume  
709 9, pp. 383-397.
- 710 Li, B. et al., 2017. NOREVA: normalization and evaluation of MS-based metabolomics data. *Nucleic Acids*  
711 *Research*, 5, Volume 45, pp. W162-W170.
- 712 Livera, A. M. D. et al., 2015. Statistical Methods for Handling Unwanted Variation in Metabolomics Data.  
713 *Analytical Chemistry*, 3, Volume 87, pp. 3606-3615.
- 714 Miller, M. J. et al., 2015. Untargeted metabolomic analysis for the clinical screening of inborn errors of  
715 metabolism. *Journal of Inherited Metabolic Disease*, Volume 38, pp. 1029-1039.
- 716 Pedregosa, F. et al., 2011. Scikit-learn: Machine Learning in Python. *Journal of Machine Learning*  
717 *Research*, Volume 12, pp. 2825-2830.

- 718 Redestig, H. et al., 2009. Compensation for Systematic Cross-Contribution Improves Normalization of  
719 Mass Spectrometry Based Metabolomics Data. *Analytical Chemistry*, Volume 81, pp. 7974-7980.
- 720 Rist, M. J. et al., 2017. Metabolite patterns predicting sex and age in participants of the Karlsruhe  
721 Metabolomics and Nutrition (KarMeN) study. *PLOS ONE*, 8, Volume 12, pp. 1-21.
- 722 Sysi-Aho, M., Katajamaa, M., Yetukuri, L. & Orešič, M., 2007. Normalization method for metabolomics  
723 data using optimal selection of multiple internal standards. *BMC Bioinformatics*, Volume 8, p. 93.
- 724 Välikangas, T., Suomi, T. & Elo, L. L., 2016. A systematic evaluation of normalization methods in  
725 quantitative label-free proteomics. *Briefings in Bioinformatics*, 10, Volume 19, pp. 1-11.
- 726 Veselkov, K. A. et al., 2011. Optimized Preprocessing of Ultra-Performance Liquid Chromatography/Mass  
727 Spectrometry Urinary Metabolic Profiles for Improved Information Recovery. *Analytical Chemistry*,  
728 Volume 83, pp. 5864-5872.
- 729 Vreken, P. et al., 2002. Rapid Diagnosis of Organic Acidemias and Fatty-acid Oxidation Defects by  
730 Quantitative Electrospray Tandem-MS Acyl-Carnitine Analysis in Plasma. In: *Current Views of Fatty Acid*  
731 *Oxidation and Ketogenesis*. sl:Springer US, pp. 327-337.
- 732 Yu, Z. et al., 2012. Human serum metabolic profiles are age dependent. *Aging Cell*, Volume 11, pp. 960-  
733 967.

734

735

#### 736 **Author contribution**

737 Ramon Bonte performed all the experimental work and developed the chromatographic- and mass  
738 spectrometric method. Compound identification was also done by him. Michiel Bongaerts designed the  
739 statistical models, the computational framework and analyzed the data. The manuscript was written by  
740 Michiel Bongaerts, Henk Blom and George Ruijter. Serwet Demirdas and Ed Jacobs contributed in  
741 establishing the IEM database used in this study, and actively contributed in giving feedback on the  
742 methods. Marcel Reinders contributed to in-depth reviewing of the manuscript, all analytical methods and  
743 suggested adjustments to initial work. Esmee Oussoren, Ans van der Ploeg, Margreet Wagenmakers and  
744 Robert Hofstra provided resources. The research was under supervision of George Ruijter.

745

746 **Conflicts of Interest:** All authors state that they have no conflict of interest to declare. None of the authors  
747 accepted any reimbursements, fees, or funds from any organization that may in any way gain or lose  
748 financially from the results of this study. The authors have not been employed by such an organization. The  
749 authors have not act as an expert witness on the subject of the study. The authors do not have any other  
750 conflict of interest.

751 **Funding information:** This work was supported by the Erasmus Medical Centre, department Clinical  
752 Genetics.

753

754 **Data and Code availability**

755 The regression model, *Best Correlated Internal Standard*, *PQN*, *Anchor* and *Metchalizer(Log)* were  
756 developed in Python and are available at <https://github.com/mbongaerts/Metchalizer>. The code developed  
757 for merging the batches can also be found here. The Progenesis QI processed data for all 8 batches is  
758 available at <https://github.com/mbongaerts/Metchalizer/Data>. We removed the patient samples for privacy  
759 reasons.

760

761

762
